# Supplementary material for: Ultrafast synthesis of AFX-Type zeolite with enhanced activity in the selective catalytic reduction of NOx and hydrothermal stability
Source: Royal Society of Chemistry journal article supplement (doi:10.1039/c9ra02787d), 2019-01-01
Supplement: c9ra02787d1.pdf [file c9ra02787d1.pdf]

## Electronic Supplementary Information

# Ultrafast Synthesis of AFX-Type Zeolite with Enhanced Activity in Selective Catalytic Reduction of NO<sub>x</sub> and Hydrothermal Stability

Anand Chokkalingam, Watcharop Chaikittisilp, Kenta Iyoki, Sye Hoe Keoh, Yutaka Yanaba, Takeshi Yoshikawa, Tetsuro Kusamoto, Tatsuya Okubo, and Toru Wakihara \*

## 1. Supplementary Figures

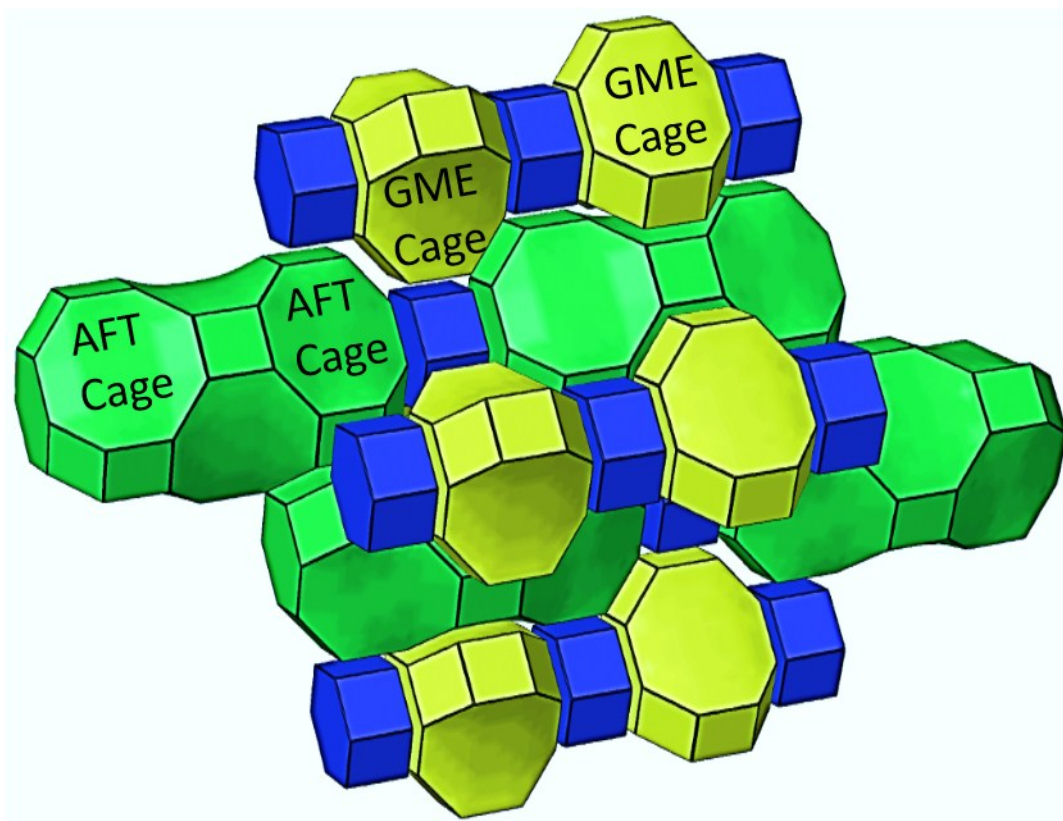

**Figure S1.** Representation of AFX structure (copyright © 2017 Structure Commission of the International Zeolite Association (IZA-SC))

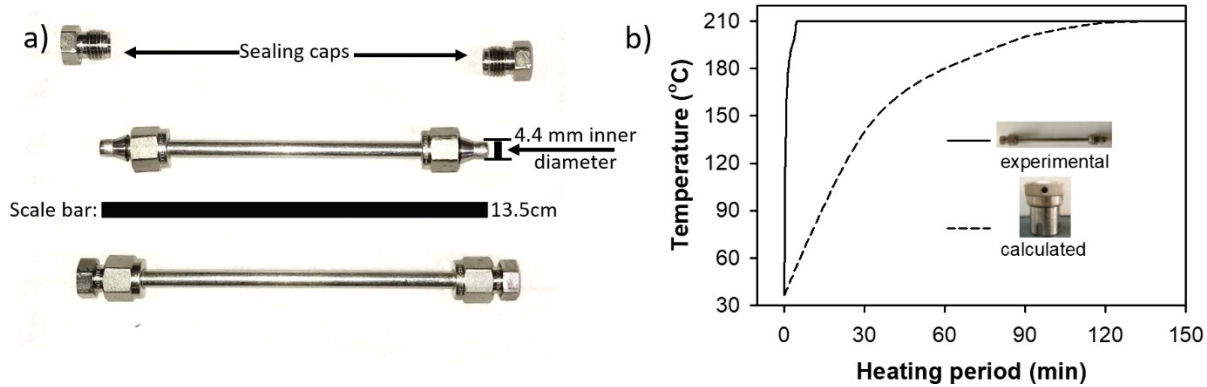

**Figure S2.** a) Photograph of the sealed pipe reactors with sealing caps; b) comparison of heating profiles in sealed pipe reactor and conventional autoclaves

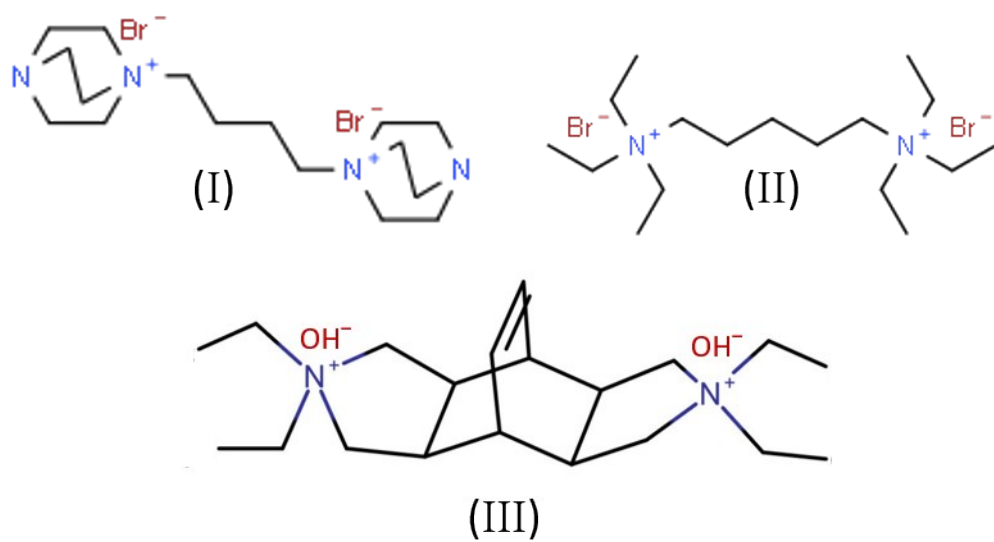

**Figure S3.** Molecular structures of OSDAs (I) DABCO; (II) Et<sub>6</sub>-Diquat-5; (III) TEBOP

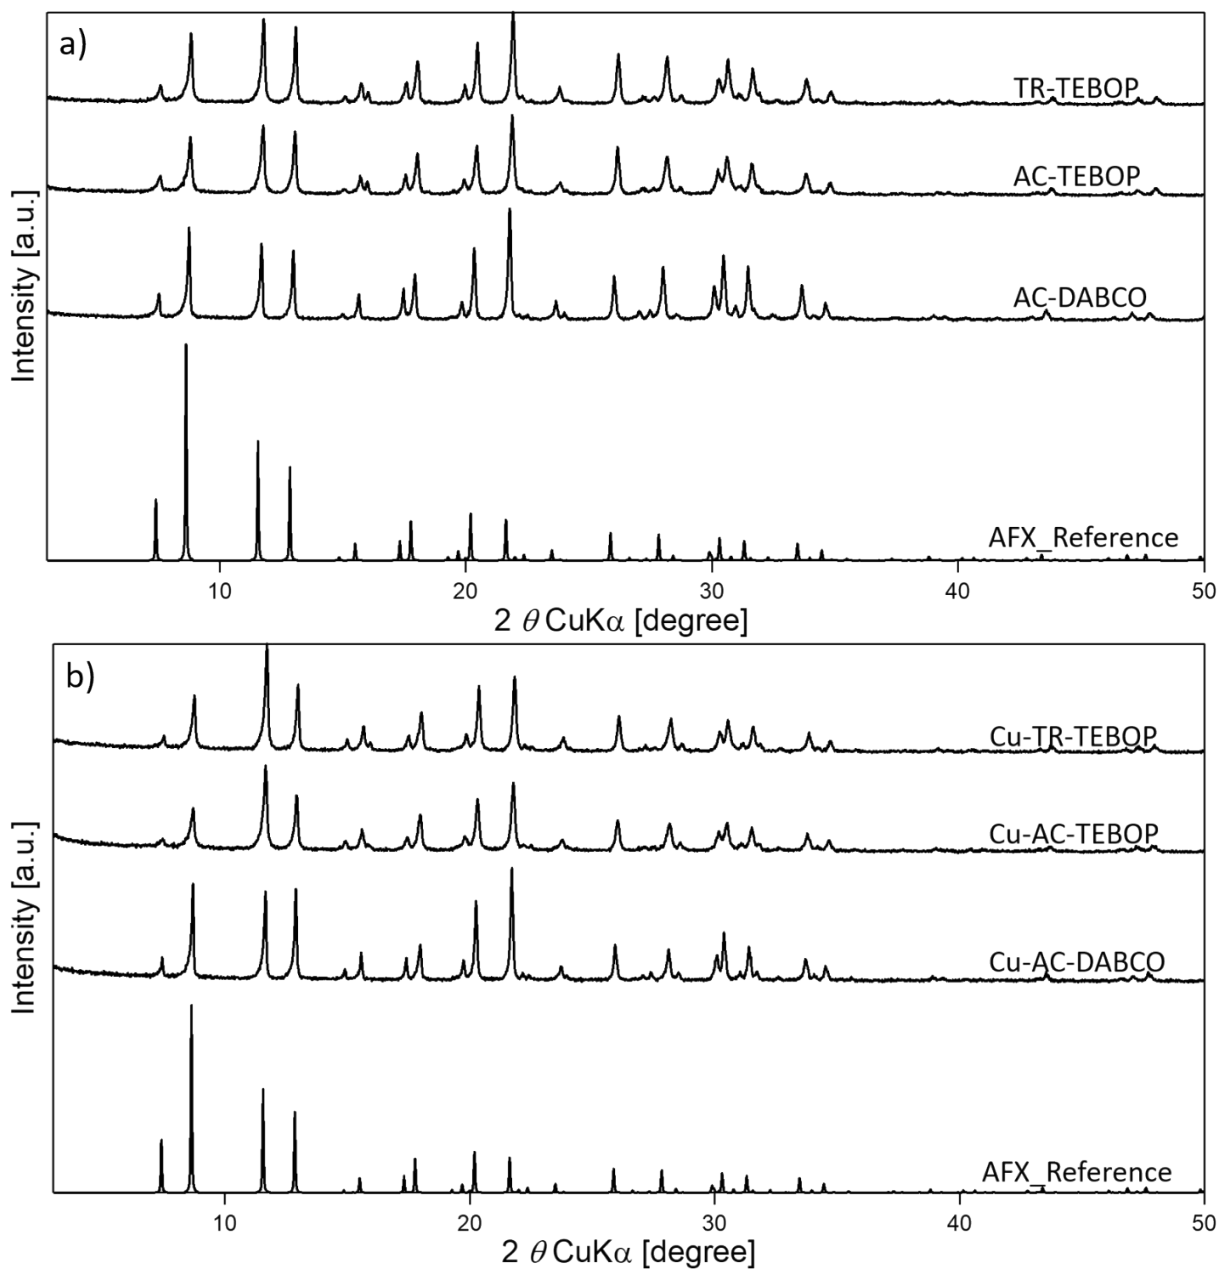

**Figure S4.** X-ray diffraction patterns of SSZ-16 samples a) calcined; b) ion-exchanged with copper in comparison to reference

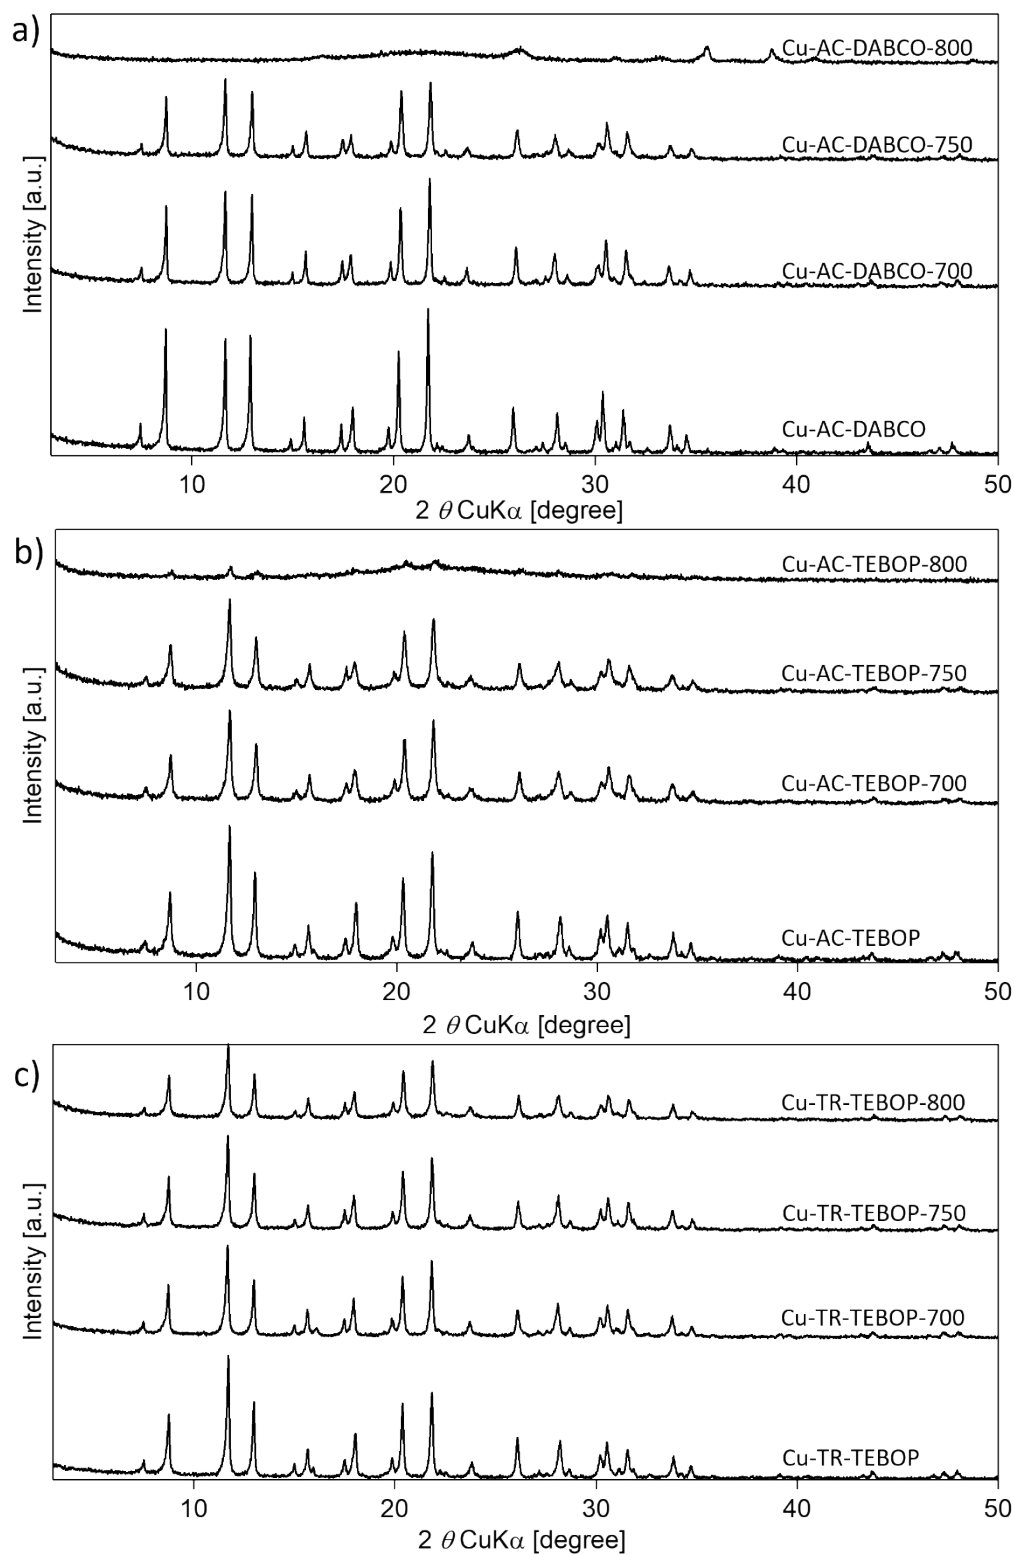

**Figure S5.** X-ray diffraction patterns of CuSSZ-16 samples before and after aging at different temperatures a) Cu-AC-DABCO series; b) Cu-AC-TEBOP series; c) Cu-TR-TEBOP series

**Table S1. Comparison of experimental conditions of previous ultrafast prepared zeolites with current study**

| Zeolite prepared     | Experimental conditions |                  |            |                  | Framework type | Reference  |
|----------------------|-------------------------|------------------|------------|------------------|----------------|------------|
|                      | Aging                   |                  | Synthesis  |                  |                |            |
|                      | Time (h)                | Temperature (°C) | Time (min) | Temperature (°C) |                |            |
| AlPO <sub>4</sub> -5 | 48                      | RT*              | 1          | 190              | AFI            | [35]       |
| SSZ-13               | 48                      | 85               | 10         | 210              | CHA            | [36]       |
| Silicalite-1         | 48                      | RT*              | 10         | 210              | MFI            | [39]       |
| Mordenite            | 0.5                     | RT*              | 10         | 210              | MOR            | [40]       |
| Erionite             | 20                      | 90               | 120        | 210              | ERI            | [41]       |
| SSZ-16               | 2                       | RT*              | 120        | 210              | AFX            | This study |

\*RT – room temperature
